# Supplementary material for: Naturally occurring aristolochic acid analogues and their toxicities
Source: Royal Society of Chemistry journal article supplement (doi:10.1039/c3np70114j), 2014-01-01
Supplement: c3np70114j1.xlsx [file c3np70114j1.xlsx]

## Sheet: Sheet1
			HK-2					Hek 293					LLC-PK1					MDCK					KB					Col-2					MCF-7					Lu-1					HCT15					A-549
			human proximal tubular cells					noncancerous human embryonic kidney cell					porcine renal tubular cell					canine kidney epithelial cells					human epidermoid carcinoma					human colon cancer					human breast carcinoma					human lung cancer					human colon adenocarcinoma					human lung adenocarcinoma
		molecular mass		μg/ml		μM	Reference		μg/ml		μM	Reference		μg/ml		μM	Reference		μg/ml		μM	Reference		μg/ml		μM	Reference		μg/ml		μM	Reference		μg/ml		μM	Reference		μg/ml		μM	Reference		μg/ml		μM	Reference		μg/ml
				45		131.944	86							3.41054		10	35		14.8051		43.41	90		4		11.7284	91																						5
				16.675		48.8926	85							3.75159		11	87							10.9137		32	89
				11.7285		40	33
1	aristolochic acid I	341.054		24.4678		73.6122								3.58106		10.5			14.8051		43.41			7.45686		21.8642																							5
				70		225.049	86							24.8834		80	35		29.9441		96.27		>	50	>	160.749	88																					>	50
			>	5	>	16.0749	85							24.2614		78	87
2	aristolochic acid II	311.043		37.5		120.562								24.5724		79			29.9441		96.27			50		160.749																							50
				50		170.608	86							22.2732		76	102							3.3		11.2602	91																>	40		136.487	109		3.2
			>	5	>	17.0608	85						>	87.9206	>	300	35							11.1366		38	89																					>	40
				7.32672		25	33																	not cytotoxic			107
3	aristolactam I	293.069		27.5		93.8346								55.0969		188								7.21831		24.6301																		40		136.487			21.6
														65.4076		200	35
4	aristolochic acid Ia	327.038												65.4076		200
				80		224.059	86						>	107.115	>	300	35
			>	5	>	14.0037	85
5	aristolochic acid IVa	357.048		42.5		119.031								107.115		300
			>	5	>	13.4748	85
6	5-Hydroxy aristolochic acid III methyl ester	371.064		5		13.4748
				85		238.063	86
			>	5	>	14.0037	85
7	9-hydroxy aristolochic acid I	357.048		45		126.033
				150		420.111	86
			>	5	>	14.0037	85
8	aristolochic acid Va	357.048		77.5		217.057
														24.9934		70	35
9	aristolochic acid E (VIIIa)	357.048												24.9934		70
													>	102.316	>	300	35
10	aristolochic acid III	341.054												102.316		300
													>	107.115	>	300	35
11	aristolochic acid VIIa	357.048												107.115		300
													>	107.115	>	300	35
12	aristolochic acid VIa	357.048												107.115		300
														27.7982		85	87						>	50		152.887	88																					>	20
																							>	50		152.887	88																					>	20
13	aristolochic acid C	327.038												27.7982		85								50		152.887																							20
													>	88.8205	>	300	35						>	59.2137	>	200	89
14	aristolic acid	296.068												88.8205		300								59.2137		200
													>	93.619	>	300	35
15	aristofolin B	312.063												93.619		300
																			93.0484		349.73	90
16	aristolic acid II	266.058																	93.0484		349.73
														26.8171		82	87
17	aristolochic acid F	327.038												26.8171		82
														31.9018		93	87
18	aristolochic acid G	343.03												31.9018		93
19	aristophyllide A	557.205
20	aristophyllide B	571.22
21	aristophyllide C	543.189
													>	158.157	>	300	35
22	aristophyllide D	527.19												158.157		300
23	aristoloterpenate I	557.205
24	aristoloterpenate II	527.194
25	aristoloterpenate III	557.205
26	aristoloterpenate IV	527.194
																							>	50	>	146.589	88																					>	40
27	ariskanin A	341.09																						50		146.589																							40
													>	102.921	>	300	35							4.1		11.9509	88																						1.7
28	ariskanin B	343.069												102.921		300								4.1		11.9509																							1.7
																								6.2		17.3628	88																						2.3
29	ariskanin C	357.085																						6.2		17.3628																							2.3
																								11.4		31.9252	88																						3.8
30	ariskanin D	357.085																						11.4		31.9252																							3.8
																							>	50	>	134.735	88																						1.2
31	ariskanin E	371.1																						50		134.735																							1.2
																							>	50	>	152.87	88																						17.4
32	3-hydroxy-4-methoxy-10-nitrophenanthrene-1-carboxylic acid methyl ester	327.074																						50		152.87																							17.4
																							>	50	>	153.815	88																						1.2
33	Aristolochic acid II methyl ester	325.066																						50		153.815																							1.2
				85		323.122	86							78.9175	>	300	35							4.1		15.5859	91																						1.7
			>	5	>	19.0072	85
37	aristolactam II	263.058		45		171.065								78.9175		300								4.1		15.5859																							1.7
														35.9546		79	102						>	50	>	109.861	91
														37.7751		83	102							13.1985		29	89
														136.536	>	300	35
38	aristolactam I-b-D-glucoside	455.122												70.0887		154								31.5993		69.4304
														132.332	>	300	35						>	50	>	113.351	88																						4.6
39	aristolactam C-b-glucoside	441.106												132.332		300								50		113.351																							4.6
				22.28		68.9614	104							84.3206	>	300	35																																4.21603
40	aristololactam A IIIa	281.069		22.28		68.9614								84.3206		300																																	4.21603
														36.3855		75	102
41	6-methoxyl aristolactam I N-b- glucoside	485.14												36.3855		75
				28		90.5962	86							22.2526		72	102
				30.244		97.8568	85
42	aristolactam IVa	309.064		29.122		94.2265								22.2526		72
				20		56.6428	86
				4.535		12.8438	85
43	7-methoxy aristololactam IV	353.09		#DIV/0!		#DIV/0!
				68		210.475	86
			>	5	>	15.4761	85
44	9-hydroxy aristololactam I	323.079		#DIV/0!		#DIV/0!
				44.06		166.218	104																>	50		188.627	91	>	5	>	18.8627	106						>	5	>	18.8627	106	>	26.5074	>	100	109		5.43401
																							>	5		18.8627	106																						2.7
																							>	53.0148	>	200	89
																								2.1		7.92232	107
45	aristolactam AII	265.074		44.06		166.218																		27.5287		103.853			5		18.8627								5		18.8627			26.5074		100			4.06701
				102.04		365.617	104																																					5.5		19.7069	109		23.2
																																											>	8.3727	>	30	119		8.97
46	cepharanone B	279.09		102.04		365.617																																						6.93635		24.8535			16.085
																								not cytotoxic			107																	31.7		119.589	109		27.1
																																												7.95222	>	30	119		2.67725
47	aristolactam F I (piperolactam A)	265.074																																										19.8261		74.7946			14.8886
																																												0.569706		1.68	111
48	enterocarpam-III	339.111																																										0.569706		1.68
																																												0.429125		1.32	111
49	stigmalactam	325.095																																										0.429125		1.32
																							>	50	>	179.177	91																					>	20
50	aristolactam IIIa	279.053																						50		179.177																							20
																													0.012		0.0406663	110																	0.008
51	goniothalactam	295.084																											0.012		0.0406663																		0.008
																																												1.15603		3.74	119		19.2
52	aristololactam B III	309.1																																										1.15603		3.74			19.2
																																												6.2853		21.3	108	>	50
																																																	6.40333
53	piperolactam B	295.084																																										6.2853		21.3			28.2017
																																																>	50
54	piperolactam C	309.1																																															50
55	aristololactam GI	443.14
56	aristololactam GII	281.07
								>	20		64.704	118											>	20		64.704	118	>	20	>	64.704	118		3.6		11.6467	118	>	20		64.704	118
57	aristolactam B I	309.1							20		64.704													20		64.704			20		64.704			3.6		11.6467			20		64.704
																								15.8		53.544	88																						1.7
58	aristolactam AIII	295.084																						15.8		53.544																							1.7
									17.97		60.8994	118												1.98		6.71012	118	>	20	>	67.779	118		9.45		32.0256	118	>	20		67.779	118		8.20313		27.8	109
																								not cytotoxic			107
59	aristolactam F II=goniopedaline	295.077							17.97		60.8994													1.98		6.71012			20		67.779			9.45		32.0256			20		67.779			8.20313		27.8
								>	20		67.7772	118											>	20		67.7772	118	>	20	>	67.7772	118	>	20	>	67.7772	118	>	20		67.7772	118
60	griffithinam	295.084							20		67.7772													20		67.7772			20		67.7772			20		67.7772			20		67.7772
																								13.5		46.0643	88																						19.1
																																																	10.2
61	aristolactam III	293.069																						13.5		46.0643																							14.65
									14.75		47.4156	118												2.97		9.5474	118	>	20	>	64.2923	118	>	20	>	64.2923	118	>	20		64.2923	118
62	3,5- dihydroxy-2,4-dimethoxyaristolactam	311.079							14.75		47.4156													2.97		9.5474			20		64.2923			20		64.2923			20		64.2923
63	Oldhamactam	325.095
																																												3.56397		12.77	119
64	N-methyl piperolactam A	279.09																																										3.56397		12.77
																																												1.14427		4.1	119
65	sauristolactam	279.09																																										1.14427		4.1
66	velutinam	295.29
																																	>	10	>	32.7795	123
67	cepharadione A	305.069																																10		32.7795
																																												38.2		112.648	109		40
68	norcepharadione B	307.084																																										9.31327		32.9136			17.519
																																		6.3		19.62	123							47.5		147.929	109		40
																																																>	50
69	cepharadione B	321.1																																6.3		39.6966								47.5		147.929			45
																							>	20		59.3305	124
70	ouregidione	337.095																						20		59.3305
																							>	20		56.9621	124																					>	50
71	N-methylouregidione	351.111																						20		56.9621																							50
72	artabotrine	321.064
73	4,5-dioxodehydro asimilobine	263.058
																																		0.28989		0.9	128
74	pseuduvarin A	322.1																																0.28989		0.9
																																	>	16.8055	>	50	128
75	pseuduvarin B	336.11																																16.8055		50
[truncated: 19 more columns]
